# Supplementary material
Source: MDPI journal article supplement (https://www.mdpi.com/2410-3896/6/2/19)

500 nm x 500 nm x 5 nm, cell size 5 nm, Shape 5

0°

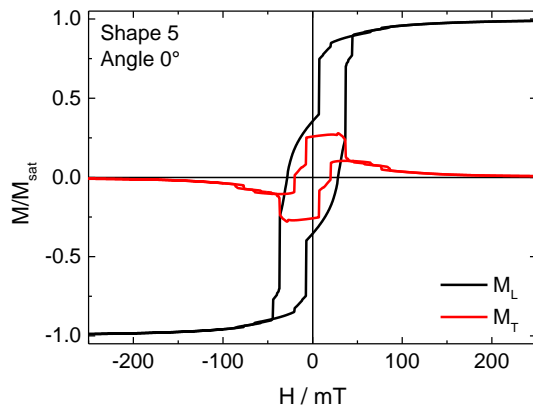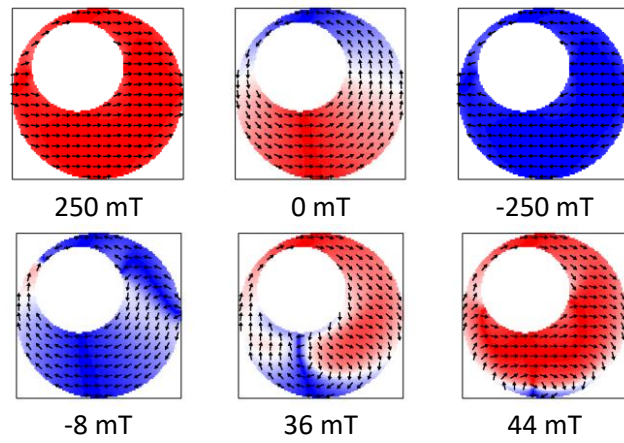

15°

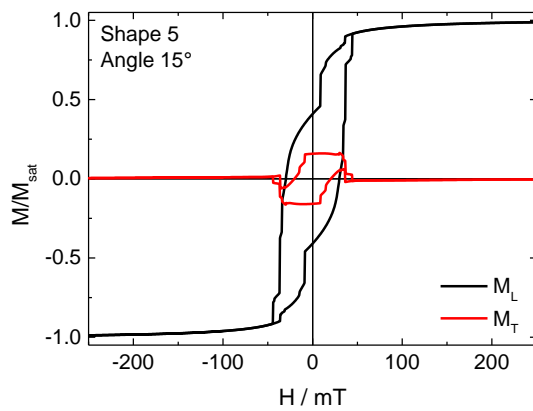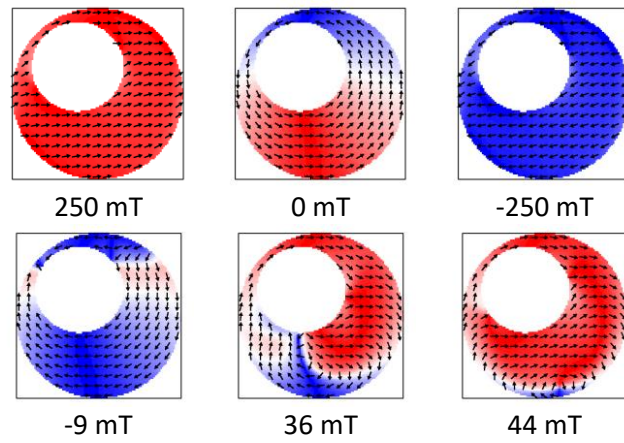

30°

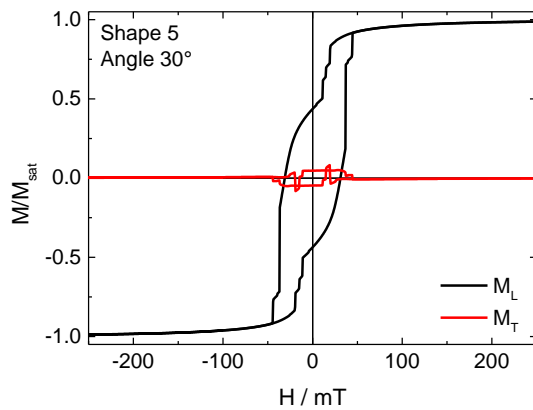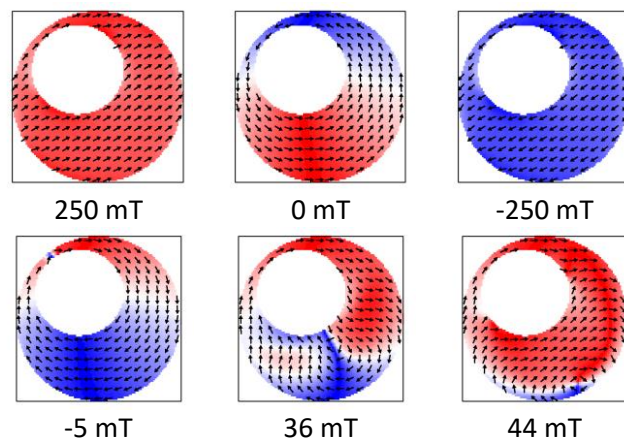

45°

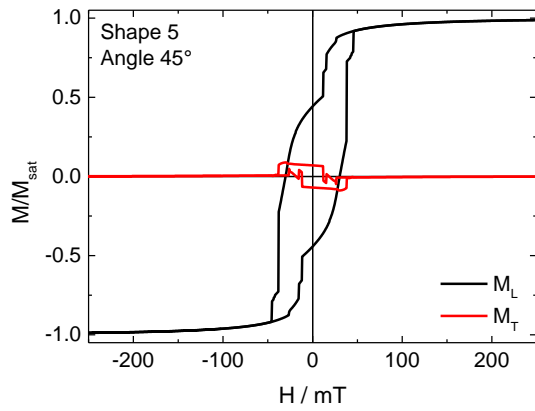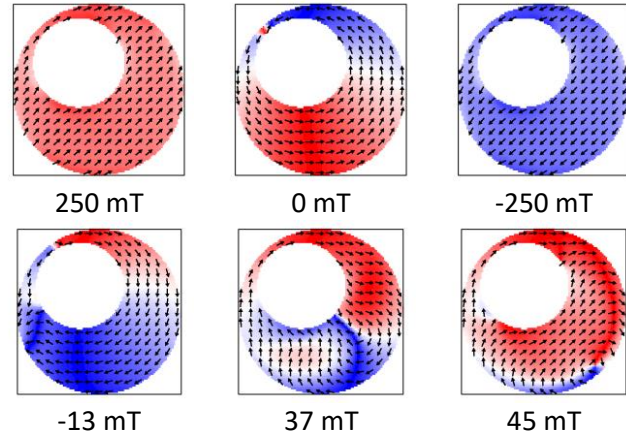

60°

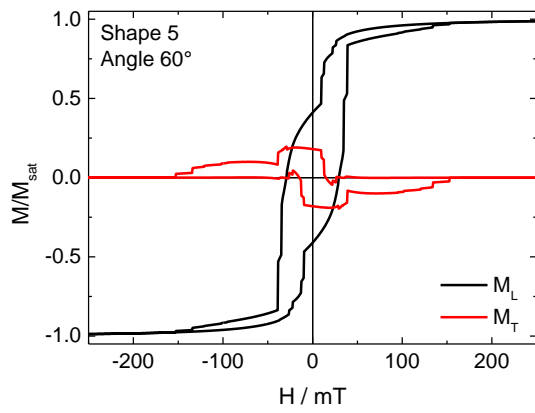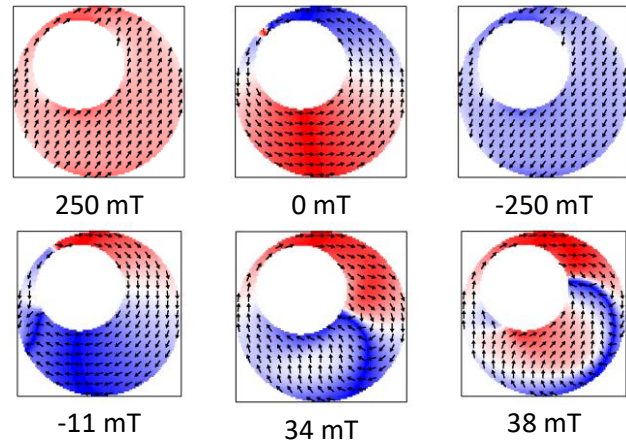

75°

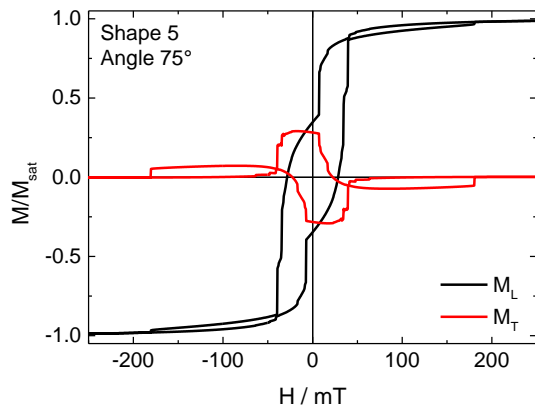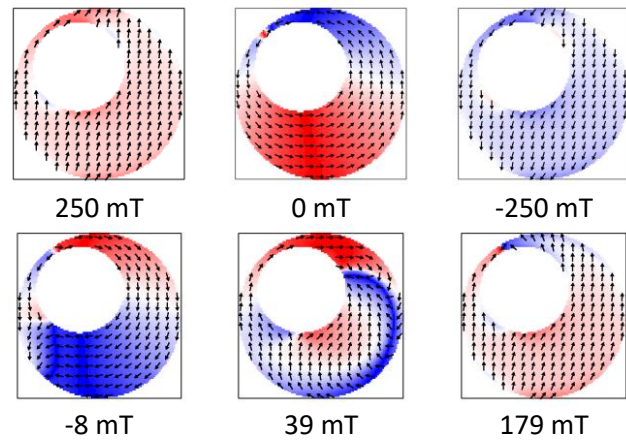

90°

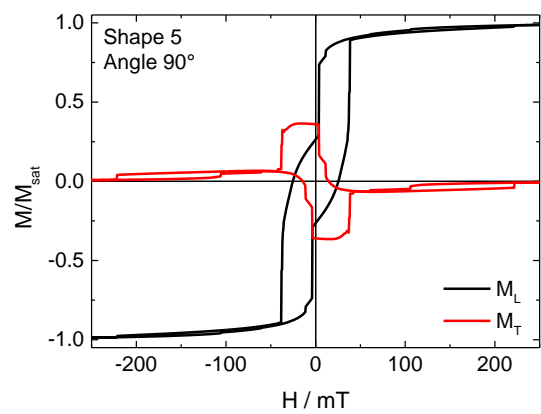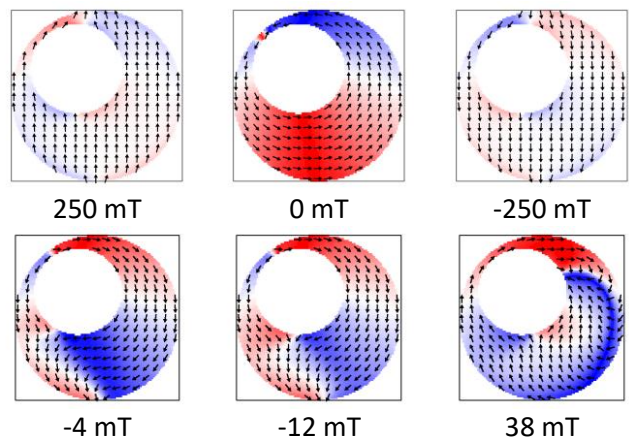

Supplement: s1 [file s1]

500 nm x 500 nm x 5 nm, cell size 5 nm, Shape 2

0°

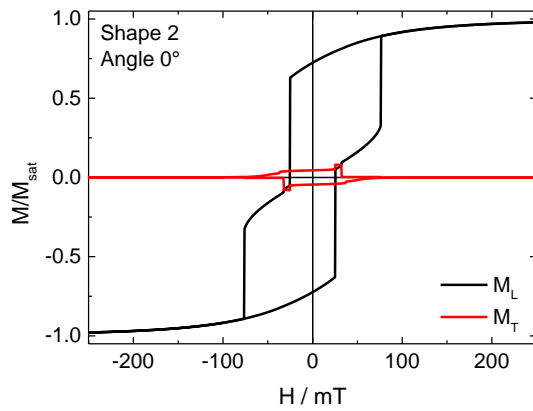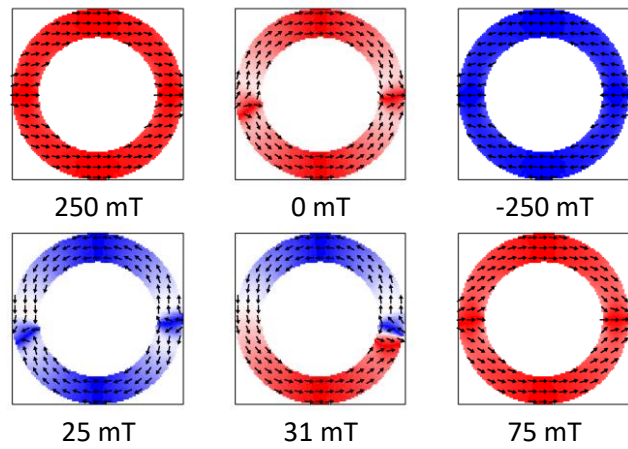

15°

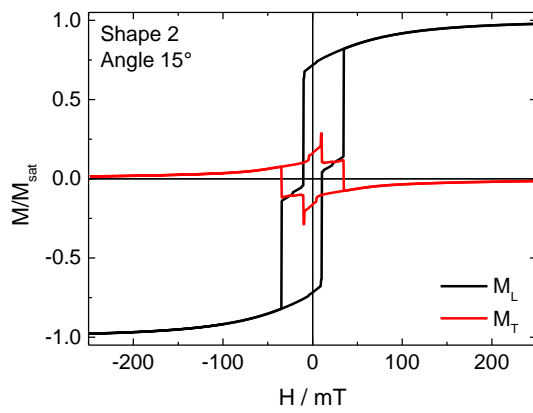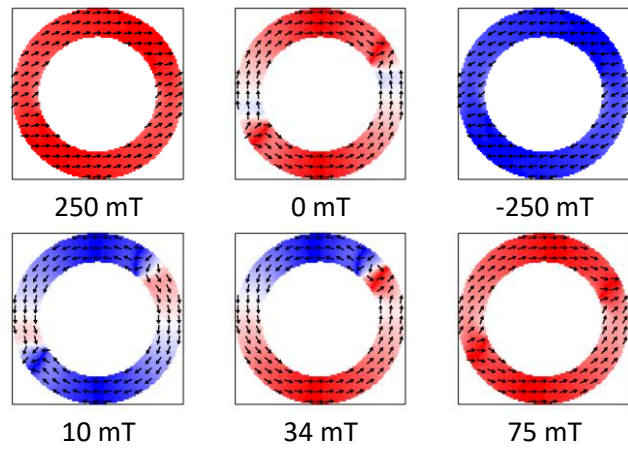

30°

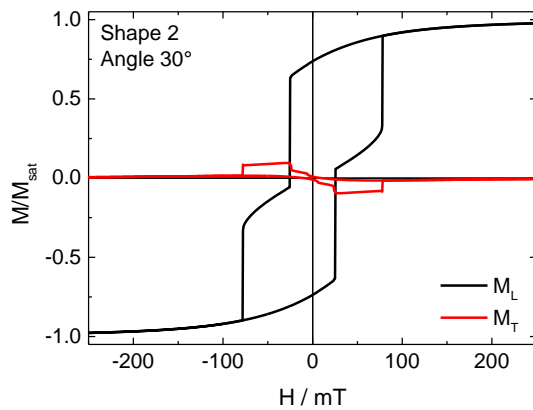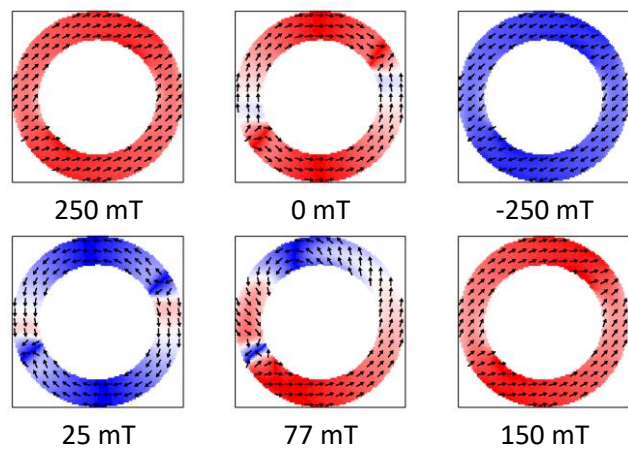

45°

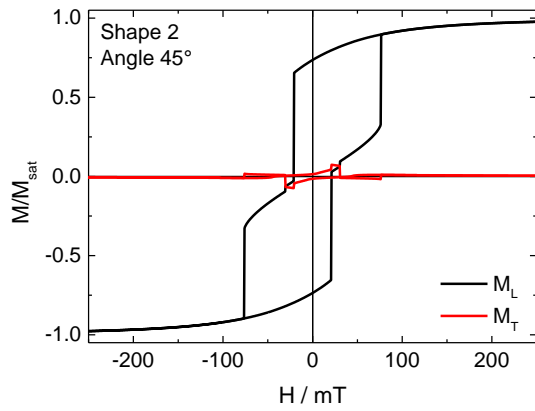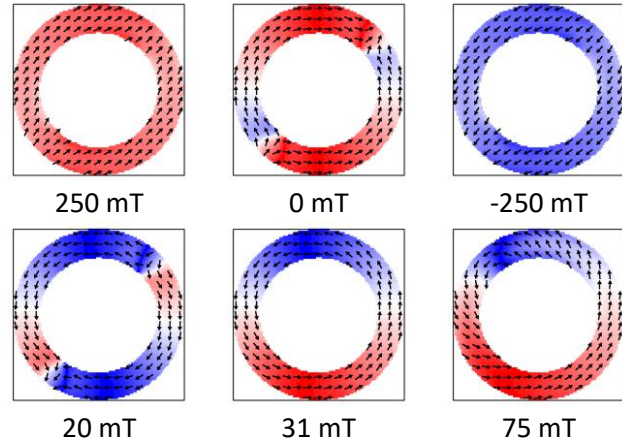

60°

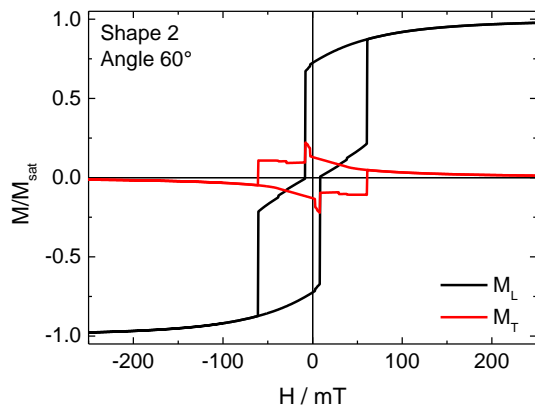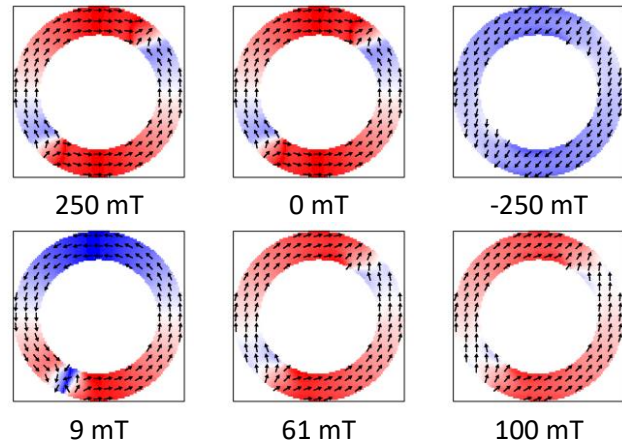

75°

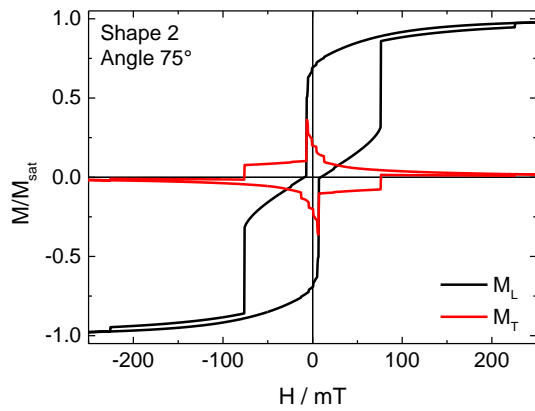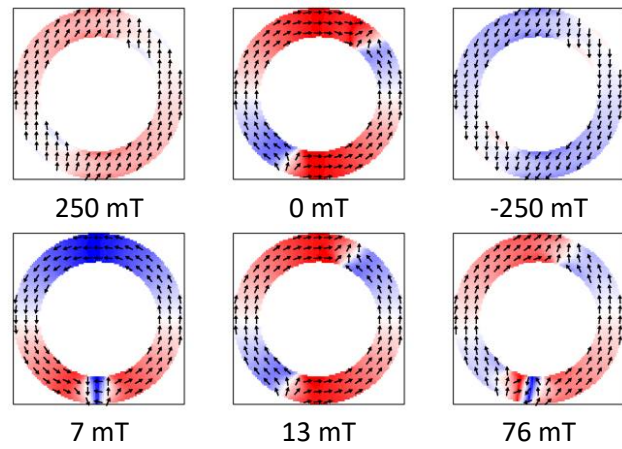

90°

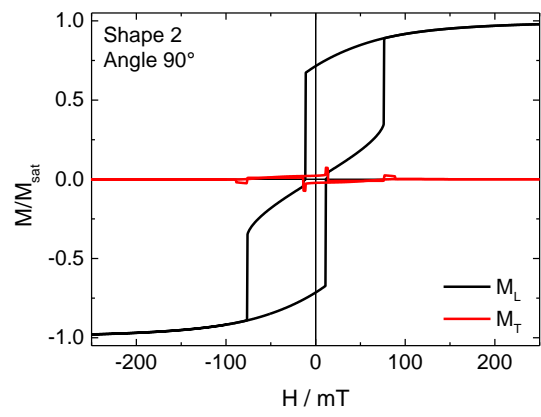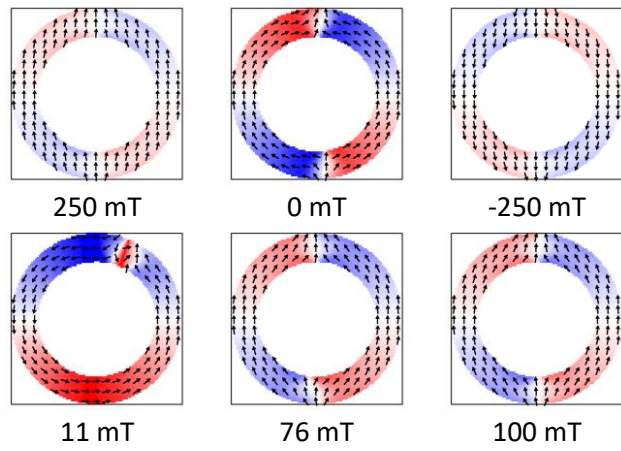

Supplement: s1 [file s1]

500 nm x 500 nm x 5 nm, cell size 5 nm, Shape 1

0°

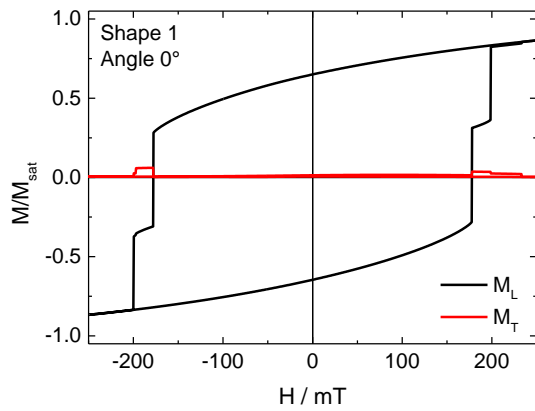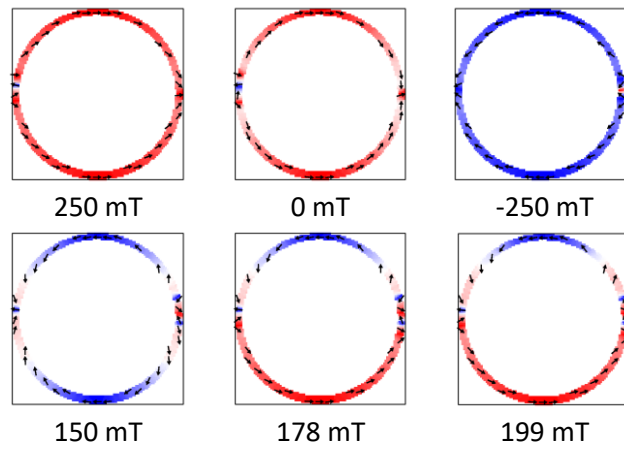

15°

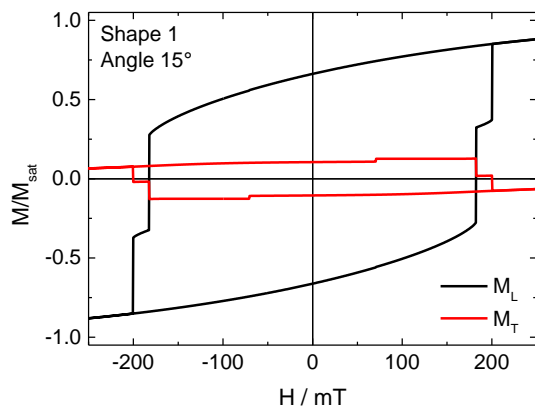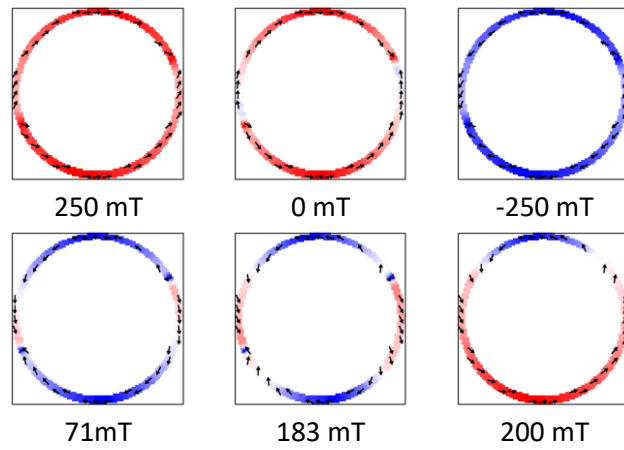

30°

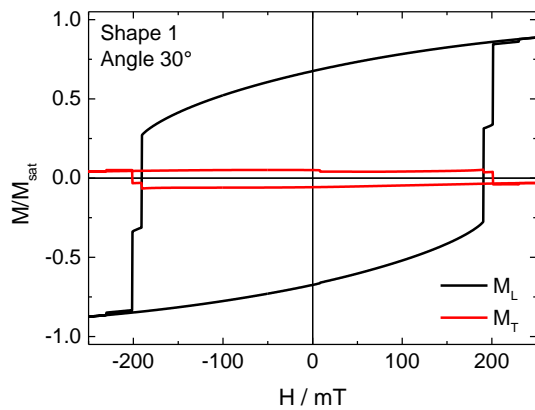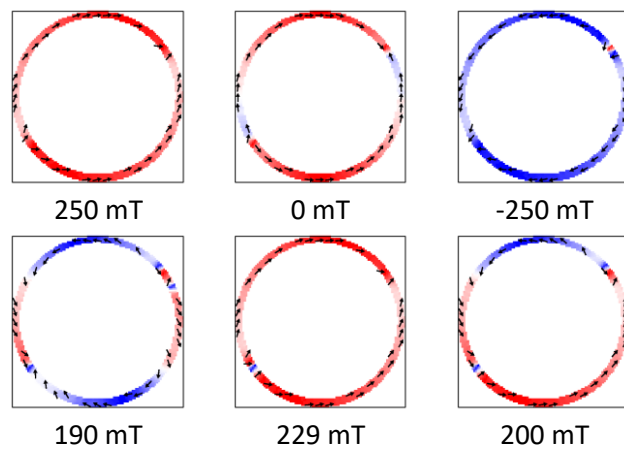

45°

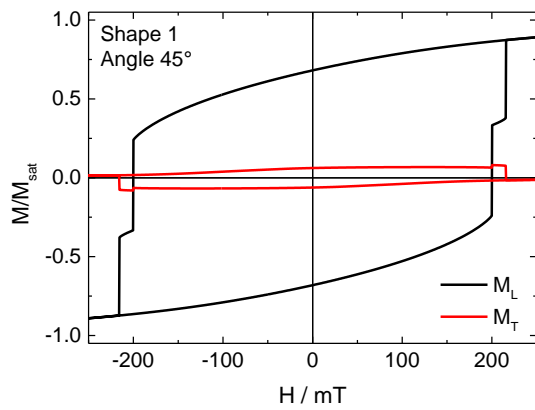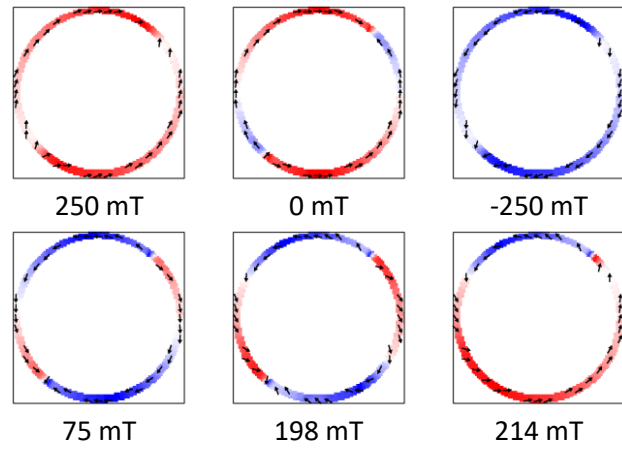

60°

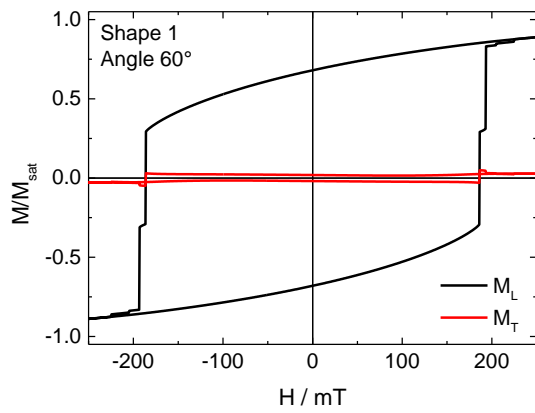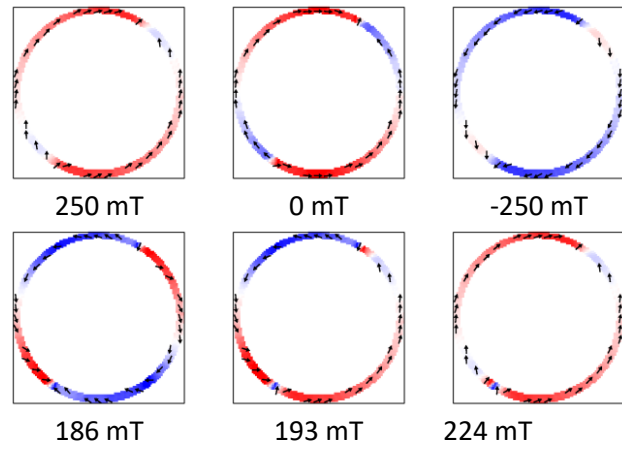

75°

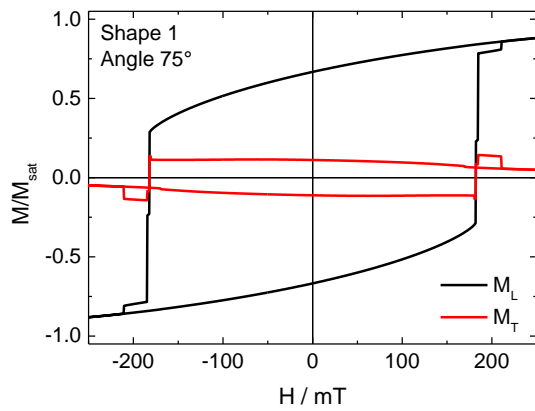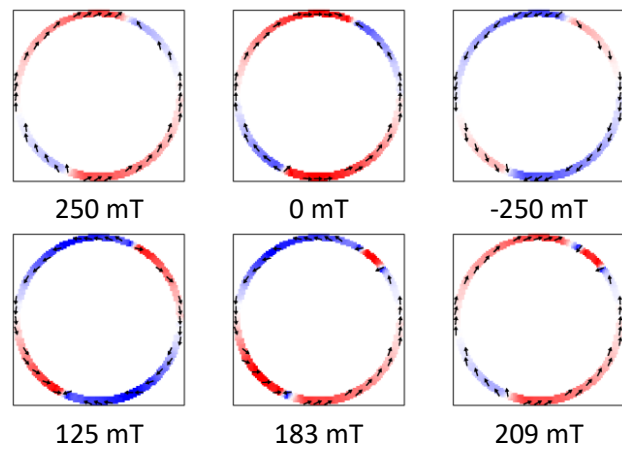

90°

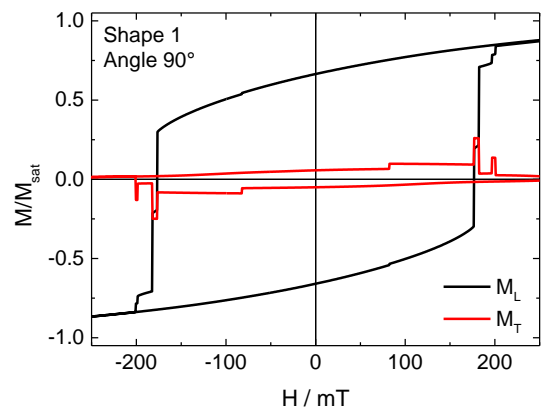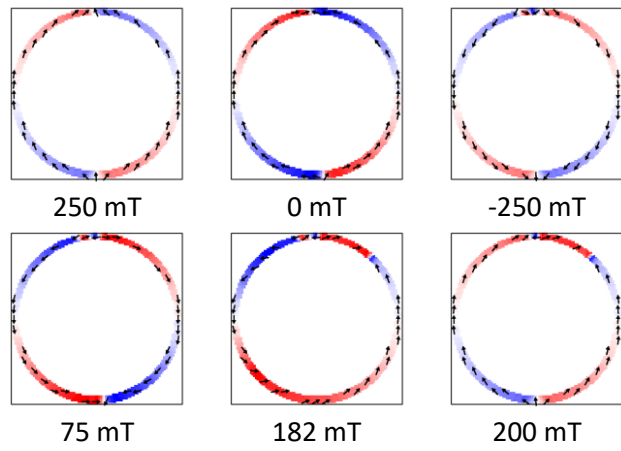

Supplement: s1 [file s1]

500 nm x 500 nm x 5 nm, cell size 5 nm, Shape 4

0°

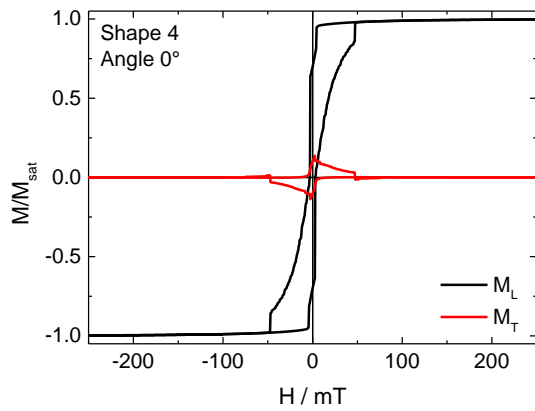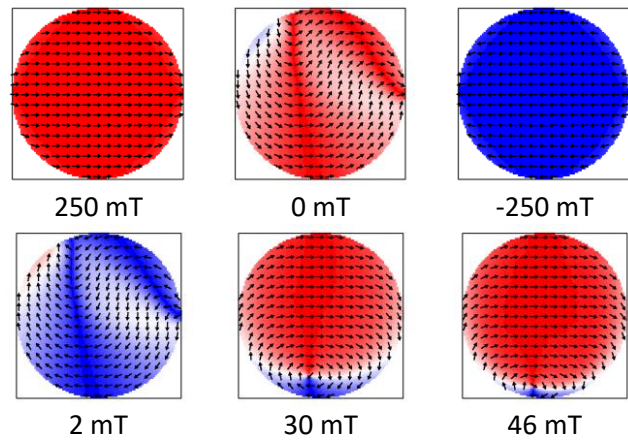

15°

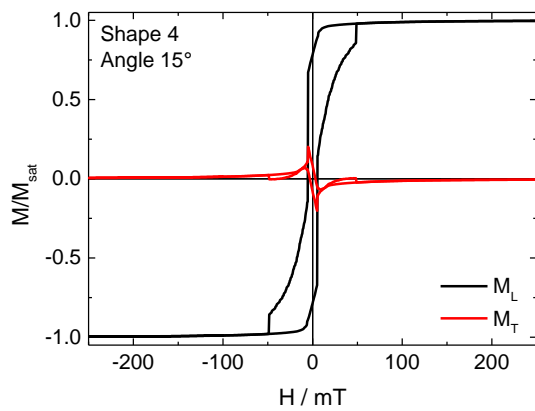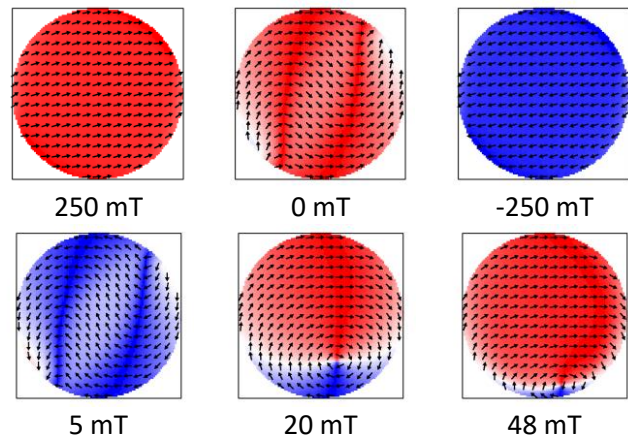

30°

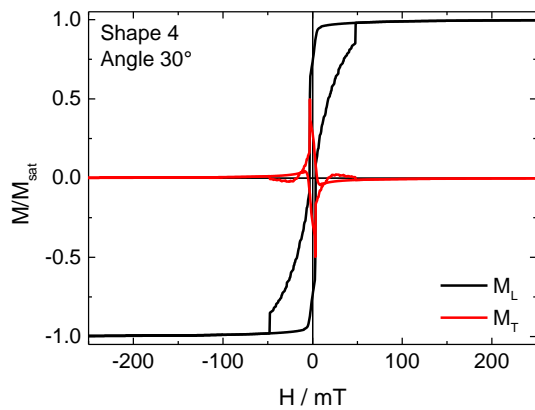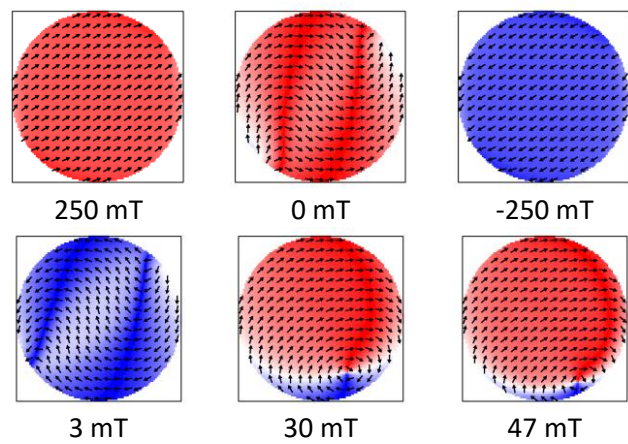

45°

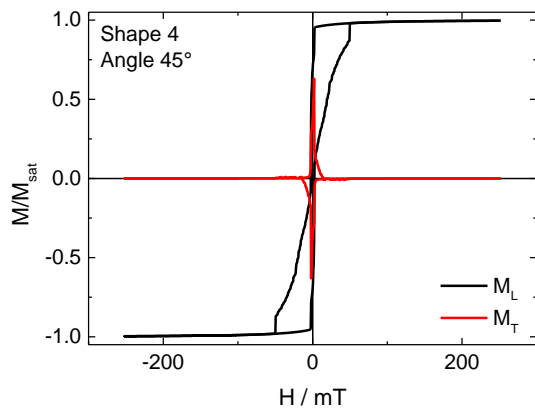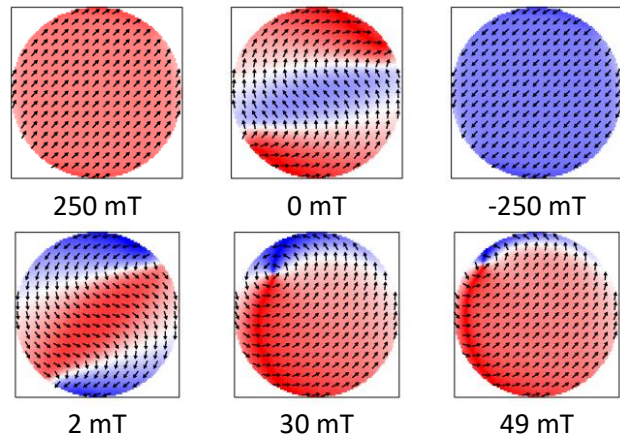

60°

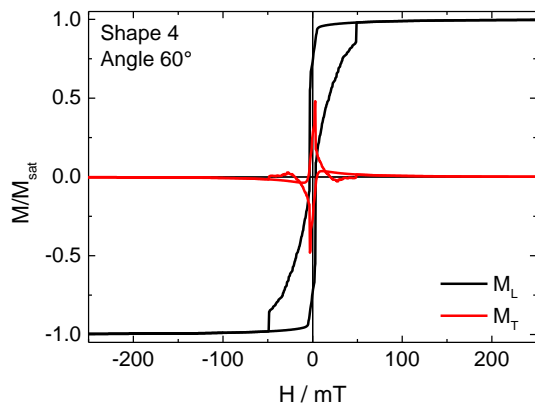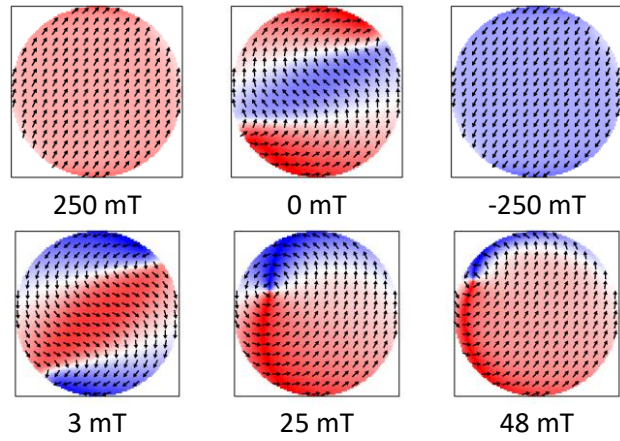

75°

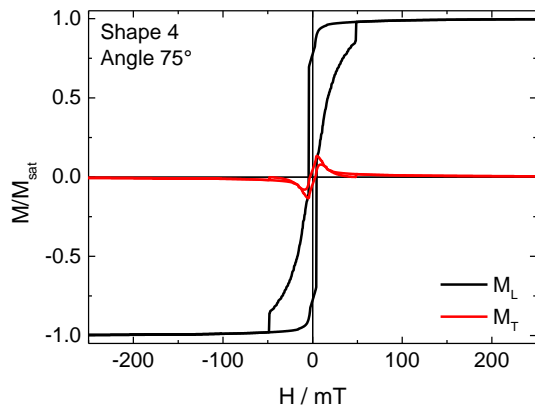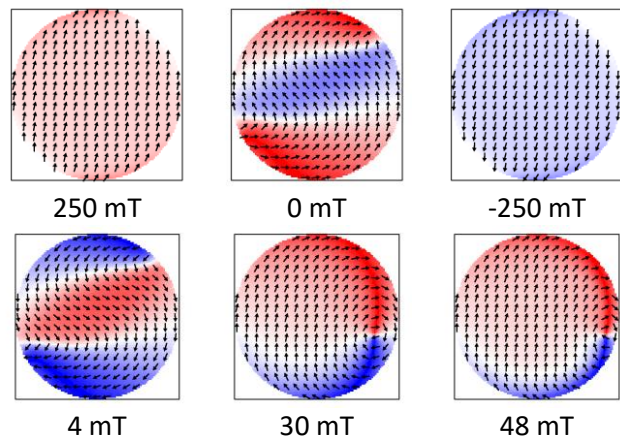

90°

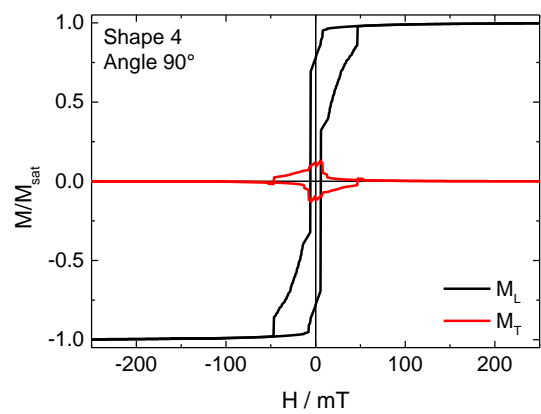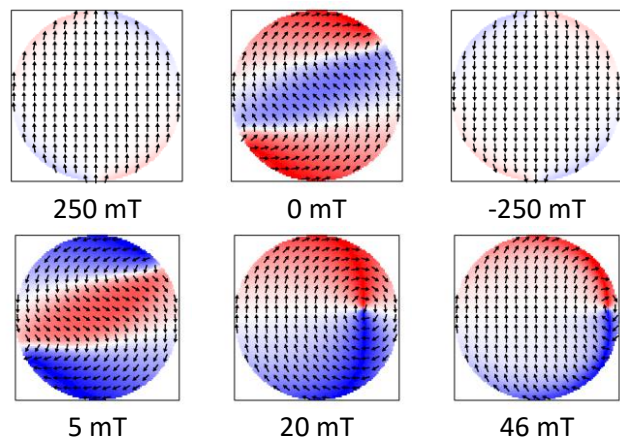

Supplement: s1 [file s1]

500 nm x 500 nm x 5 nm, cell size 5 nm, Shape 3

0°

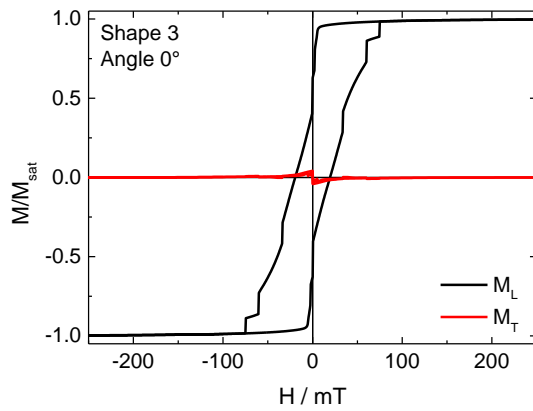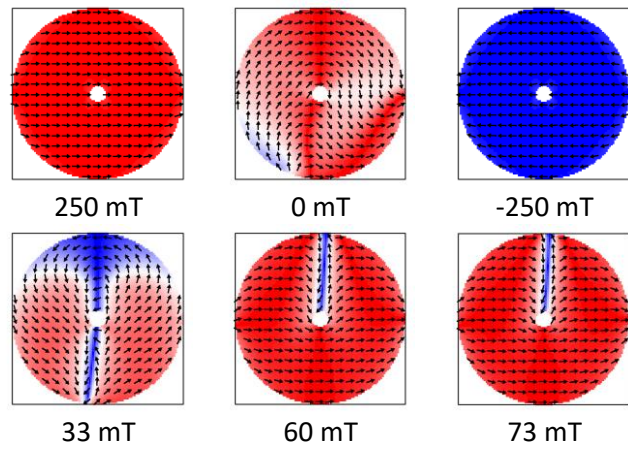

15°

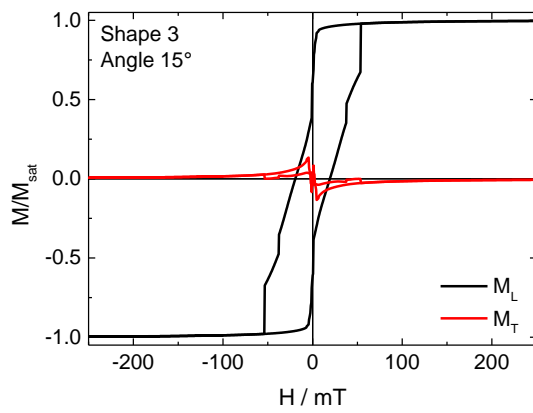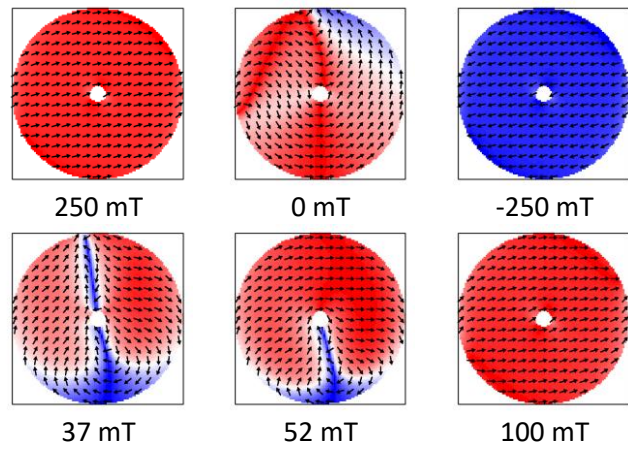

30°

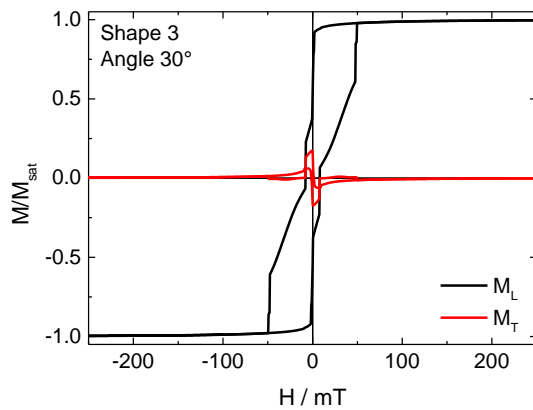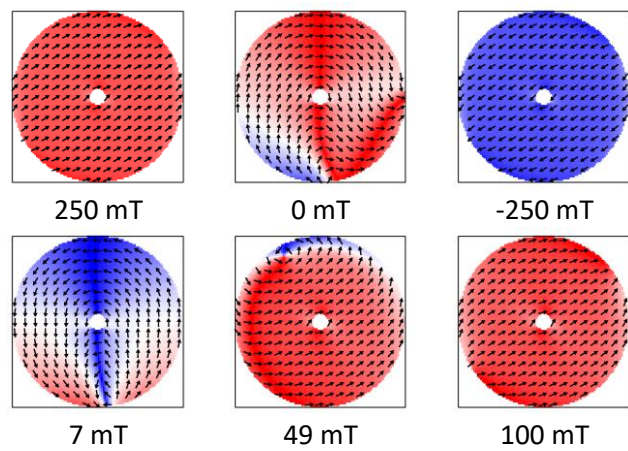

45°

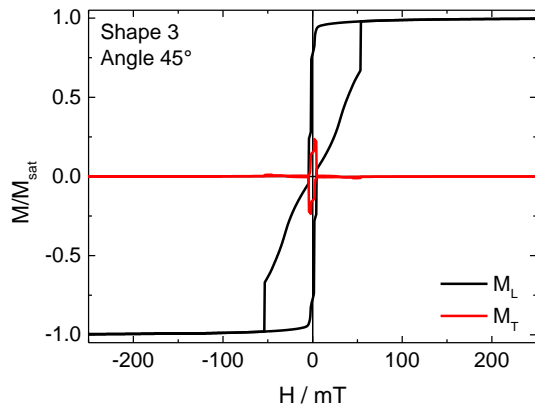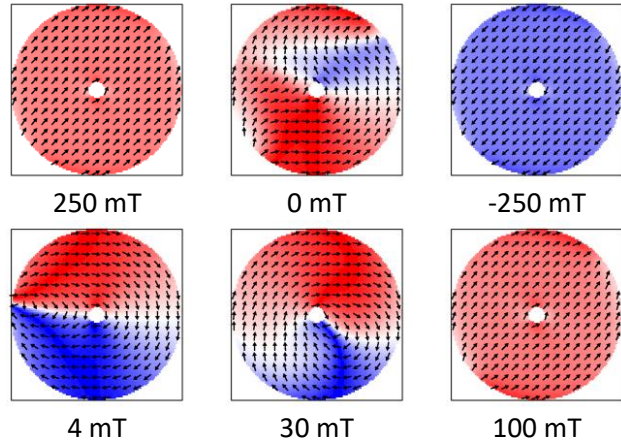

60°

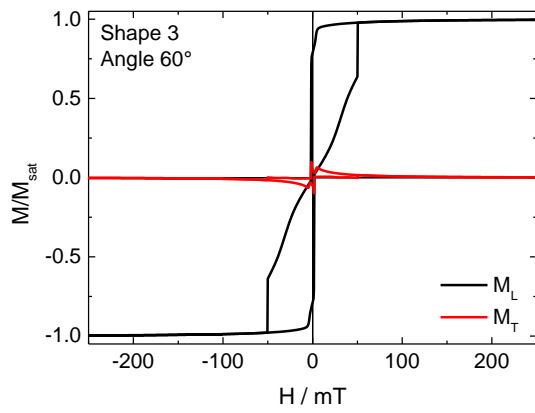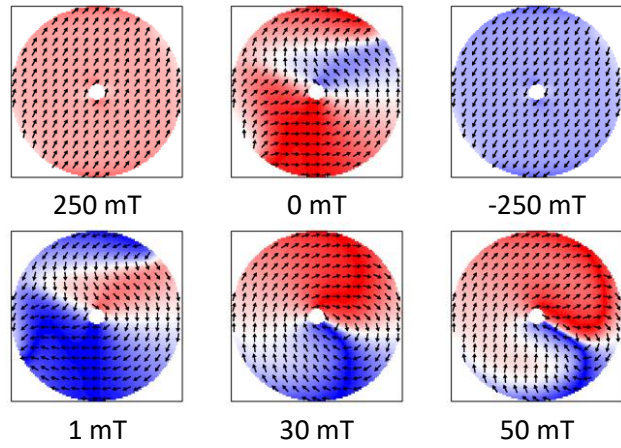

75°

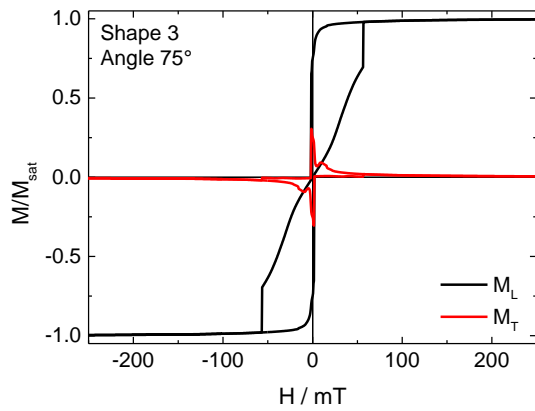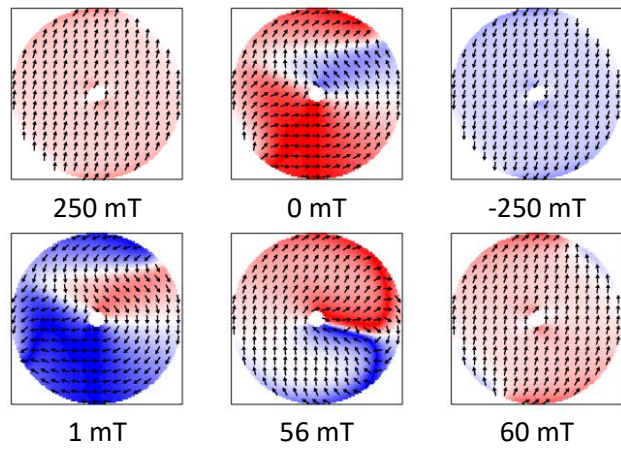

90°

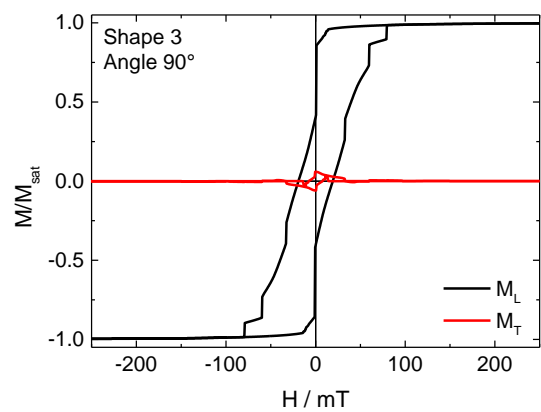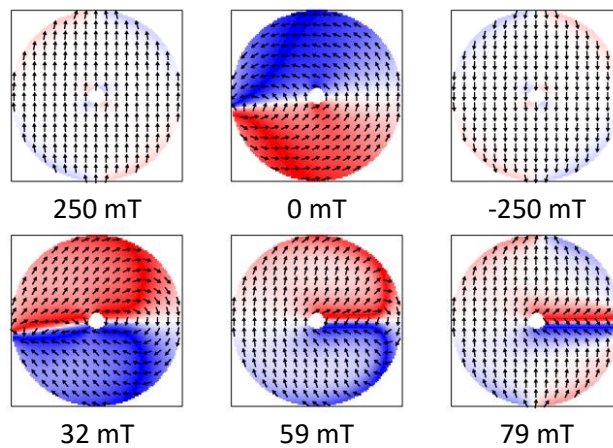

Supplement: s1 [file s1]
